# Supplementary material
Source: ML conference proceedings conference paper supplement (https://proceedings.neurips.cc/paper_files/paper/2010/hash/7f5d04d189dfb634e6a85bb9d9adf21e-Abstract.html)
Supplement: Supplementary file [file 7f5d04d189dfb634e6a85bb9d9adf21e-Supplemental.zip]

Supplementary Material to NIPS Submission ID 687:  
Space-Variant Single-Image Blind Deconvolution  
for Removing Camera Shake

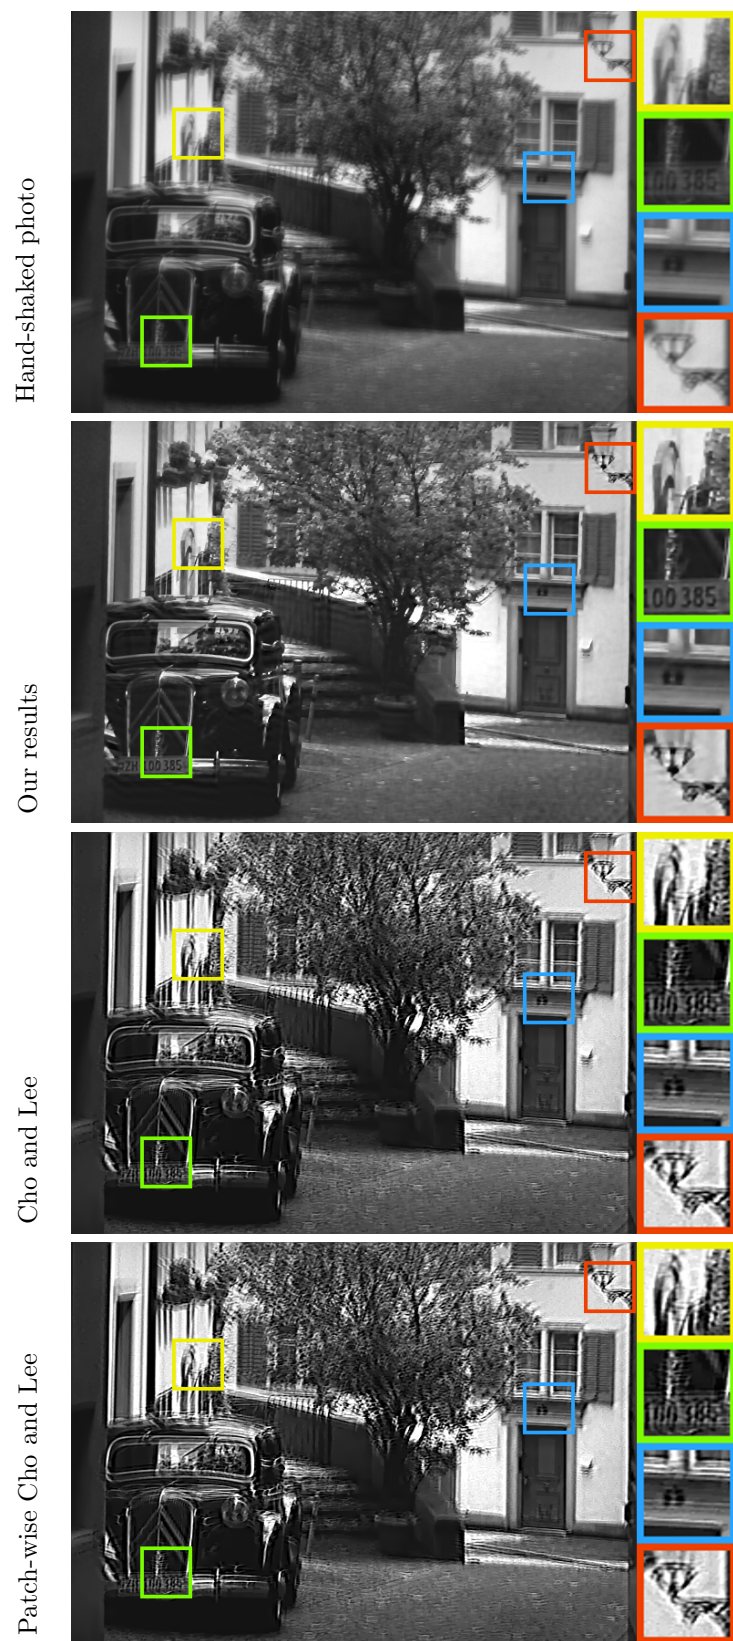

Figure 1: Vintage Car: Blurry image and comparison of deblurring results.

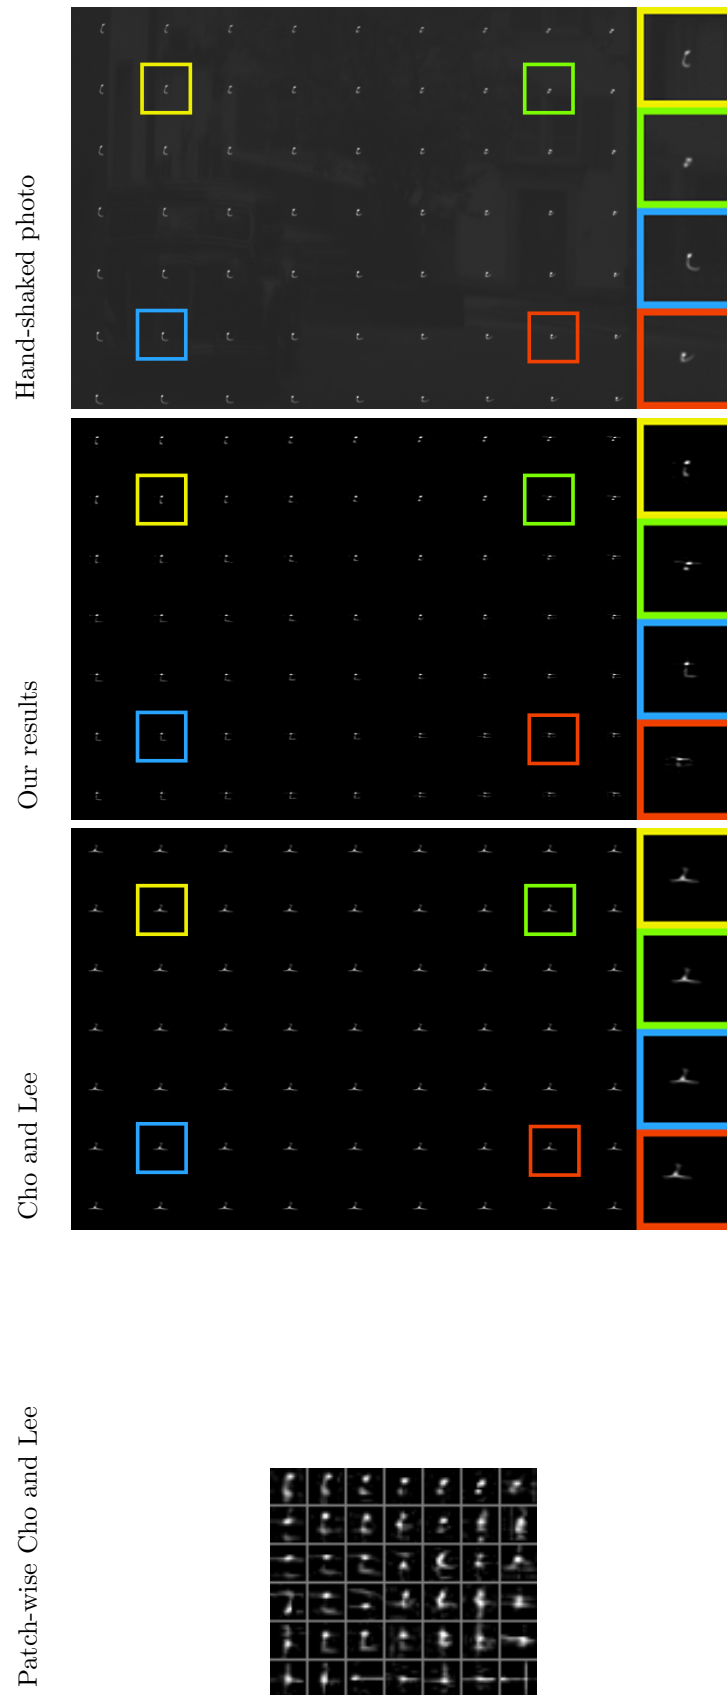

Figure 2: Vintage Car: Comparison of estimated PSFs. Note that for the patch-wise Cho and Lee method there is no obvious way to evaluate the blur at the grid of points.
